# Supplementary material
Source: PubMed Central journal article supplement (PMC6711777)

| CUTC5 Sample Information |             |                                  | STR Locus    |            |        |         |        |        |         |         |         |        |         |         |      | % Identity Match <sup>1</sup> |     |                               |
|--------------------------|-------------|----------------------------------|--------------|------------|--------|---------|--------|--------|---------|---------|---------|--------|---------|---------|------|-------------------------------|-----|-------------------------------|
| Sample Name              | Sample Type | Passage or PDX Generation Number | Donor Gender | Amelogenin | CSF1PO | D3S1358 | D5S818 | D7S820 | D8S1179 | D13S317 | D16S539 | D18S51 | D21S11  | FGA     | TH01 | TPOX                          | vWA | % Identity Match <sup>1</sup> |
| Patient 5 Tumor          | Tumor       | NA                               | Female       | X          | 11 12  | 14 18   | 11 12  | 10     | 12 13   | 12 14   | 9 12    | 12 13  | 27 31.2 | 22.2 26 | 6 8  | 9 11                          | 17  | Reference                     |
| CUTC5                    | Cell Line   | 16                               | Female       | X          | 11 12  | 14 18   | 11 12  | 10     | 12 13   | 12 14   | 9 12    | 12 13  | 27 31.2 | 22.2 26 | 6 8  | 9 11                          | 17  | 100%                          |

1 - % Identity Match calculated relative to donor sample using Tanabe et al. (1999) algorithm for 13 autosomal CODIS loci, but not including the amelogenin results.

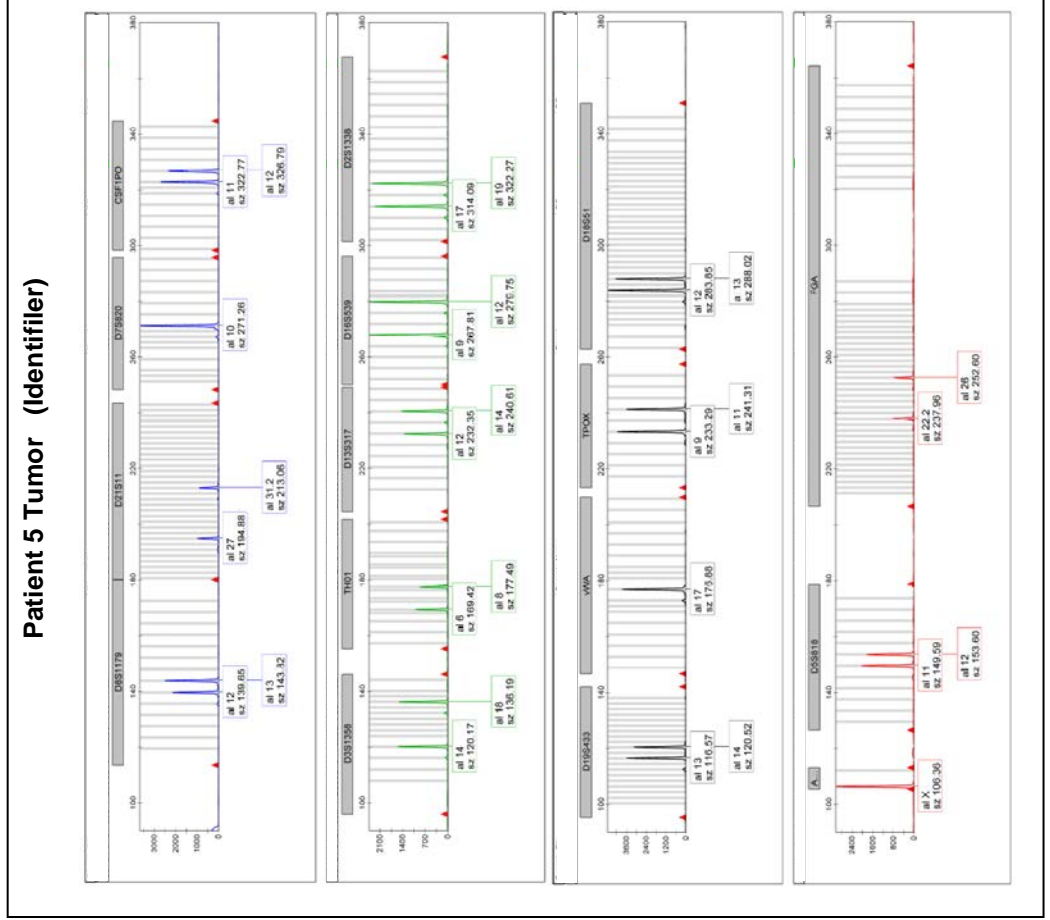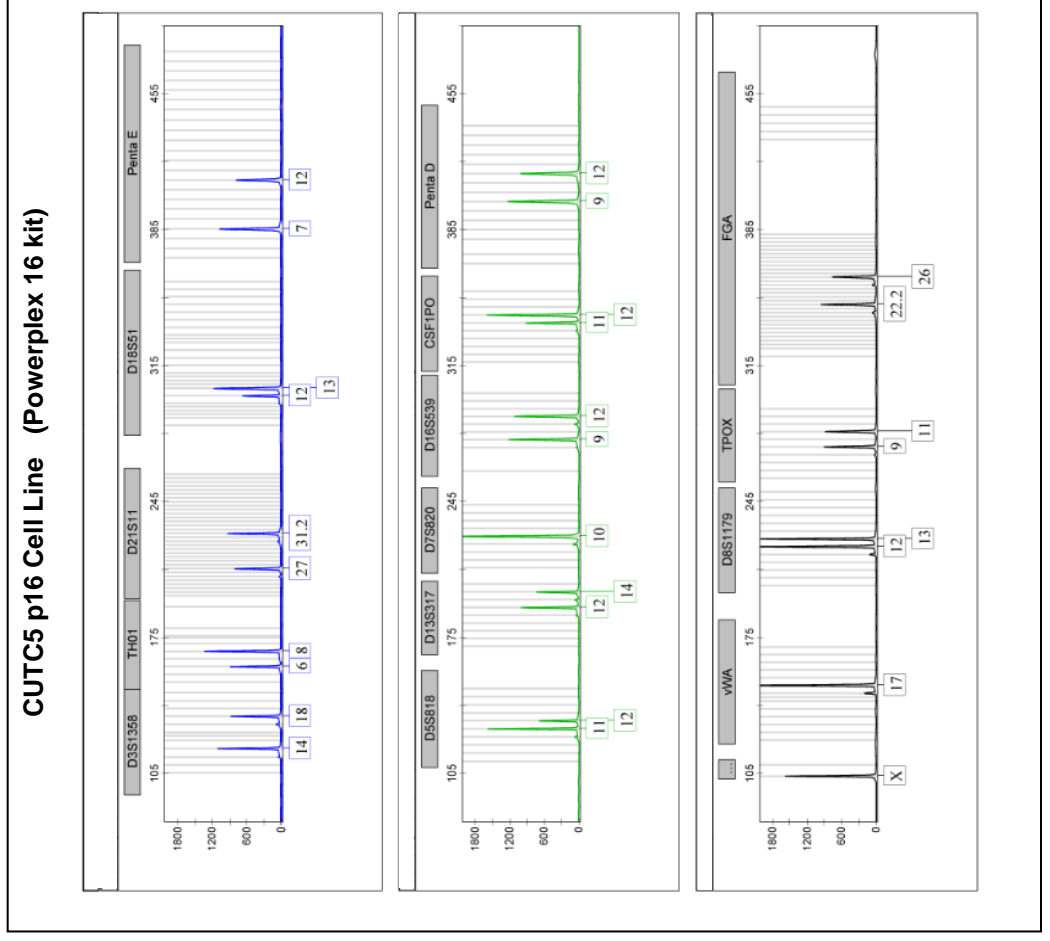

### CUTC48 Sample Information

| Sample Name | Sample Type   | Passage or PDX or Generation Number | Donor Gender |
|-------------|---------------|-------------------------------------|--------------|
| Patient 48  | Patient Blood | NA                                  | Female       |
| CUTC48      | Cell line     | 20                                  | Female       |

### STR Locus

| Amelogenin | CSF1PO | D3S1358 | D5S818 | D7S820 | D8S1179 | D13S317 | D16S539 | D18S51 | D21S11  | FGA   | TH01  | TPOX | vWA | % Identity Match 1 |
|------------|--------|---------|--------|--------|---------|---------|---------|--------|---------|-------|-------|------|-----|--------------------|
| X          | 9 12   | 14 15   | 11 12  | 7 12   | 10 13   | 11 12   | 10 11   | 15 19  | 30 32.2 | 22 23 | 6 9.3 | 8 11 | 15  | Reference          |
| X          | 9 12   | 14 15   | 11 12  | 7 12   | 10 13   | 11 12   | 11      | 15 19  | 30 32.2 | 22 23 | 6 9.3 | 8 11 | 15  | 98%                |

1 - % Identity Match calculated relative to donor sample using Tanabe et al. (1999) algorithm for 13 autosomal CODIS loci, but not including the amelogenin results.

### Patient 48 Blood (Identifier)

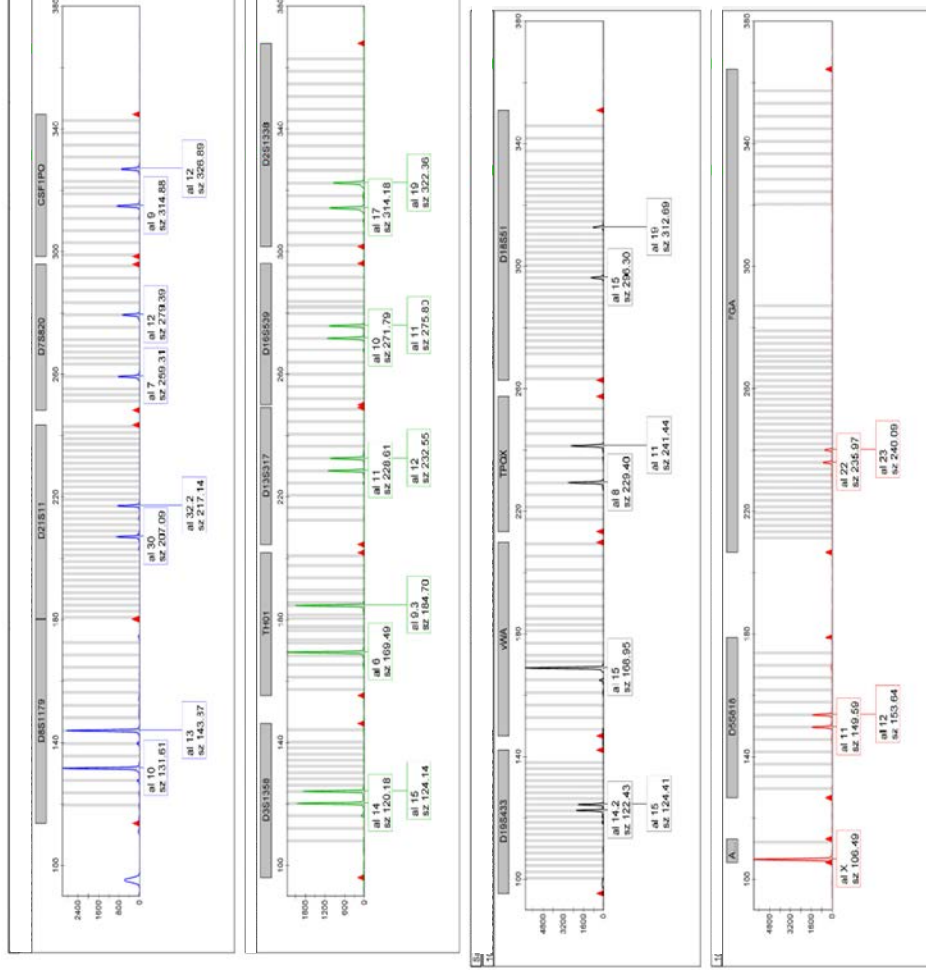

### CUTC48 p20 Cell Line (Powerplex 16 kit)

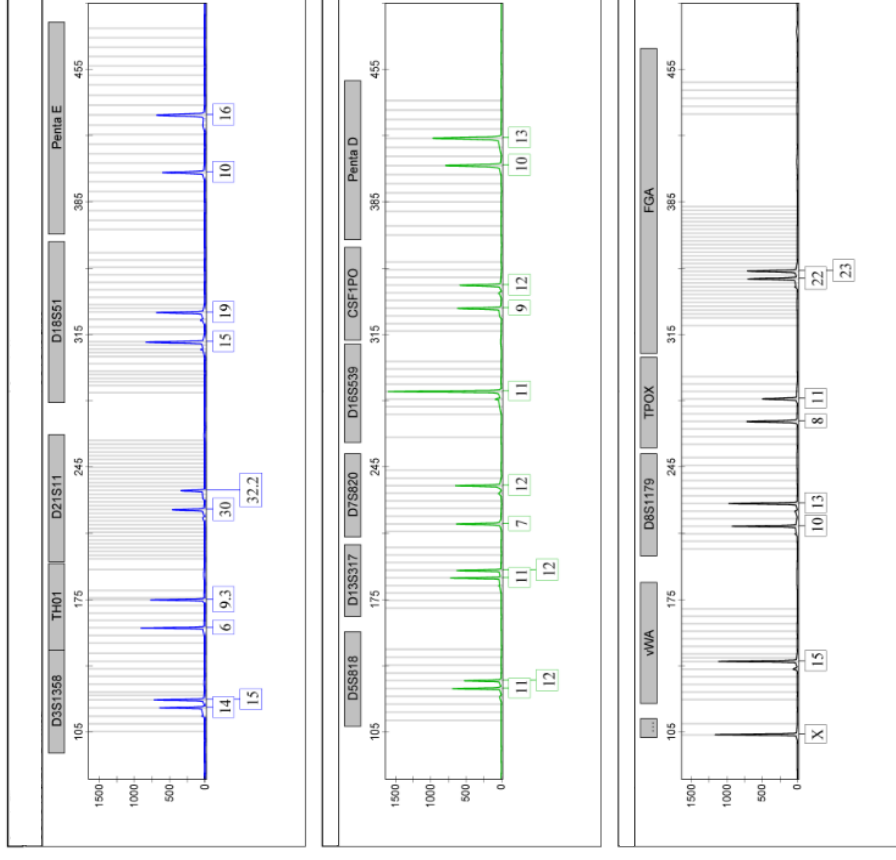

| CUTC60 Sample Information |             | STR Locus                               |              |            |        |         |        |        |         |          |         |        |         |       | % Identity Match 1 |      |       |                    |           |
|---------------------------|-------------|-----------------------------------------|--------------|------------|--------|---------|--------|--------|---------|----------|---------|--------|---------|-------|--------------------|------|-------|--------------------|-----------|
| Sample Name               | Sample Type | Passage or PDX or PDX Generation Number | Donor Gender | Amelogenin | CSF1PO | D3S1358 | D5S818 | D7S820 | D8S1179 | D13S3317 | D16S539 | D18S51 | D21S11  | FGA   | TH01               | TPOX | vWA   | % Identity Match 1 | Reference |
| Patient 60                | Tumor       | NA                                      | Female       | X          | 10 12  | 17 18   | 10 12  | 8      | 14 16   | 9 10     | 9 10    | 15 18  | 31 32.2 | 20 25 | 6 8                | 8 11 | 16 18 | 94%                | Reference |
| CUTC60 PDX                | PDX         | mF3                                     | Female       | X          | 10 12  | 17 18   | 10 12  | 8      | 14 16   | 9 10     | 9 10    | 15 18  | 31 32.2 | 25    | 6 8                | 11   | 18    | 94%                |           |
| CUTC60                    | Cell Line   | 44                                      | Female       | X          | 10 12  | 17 18   | 10 12  | 8      | 14 16   | 9        | 9 10    | 15     | 32.2    | 20    | 6 8                | 8 11 | 16 18 | 91%                |           |

1 - % Identity Match calculated relative to donor sample using Tanabe et al. (1999) algorithm for 13 autosomal CODIS loci but not including the amelogenin results.

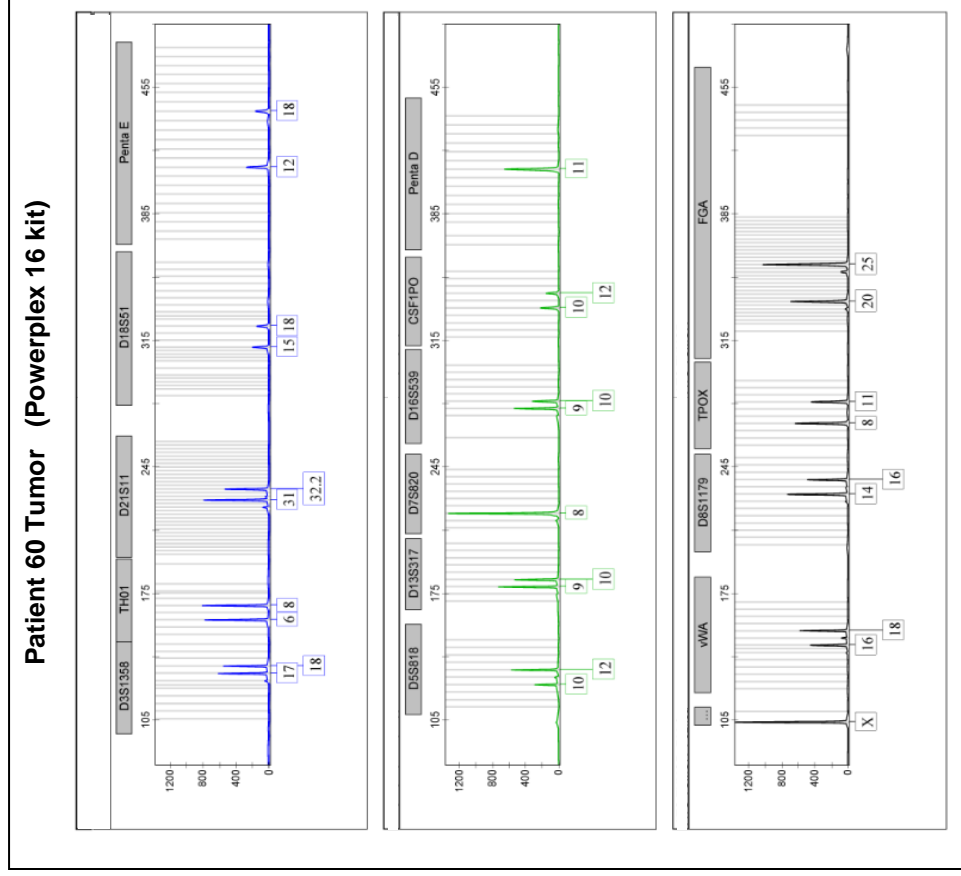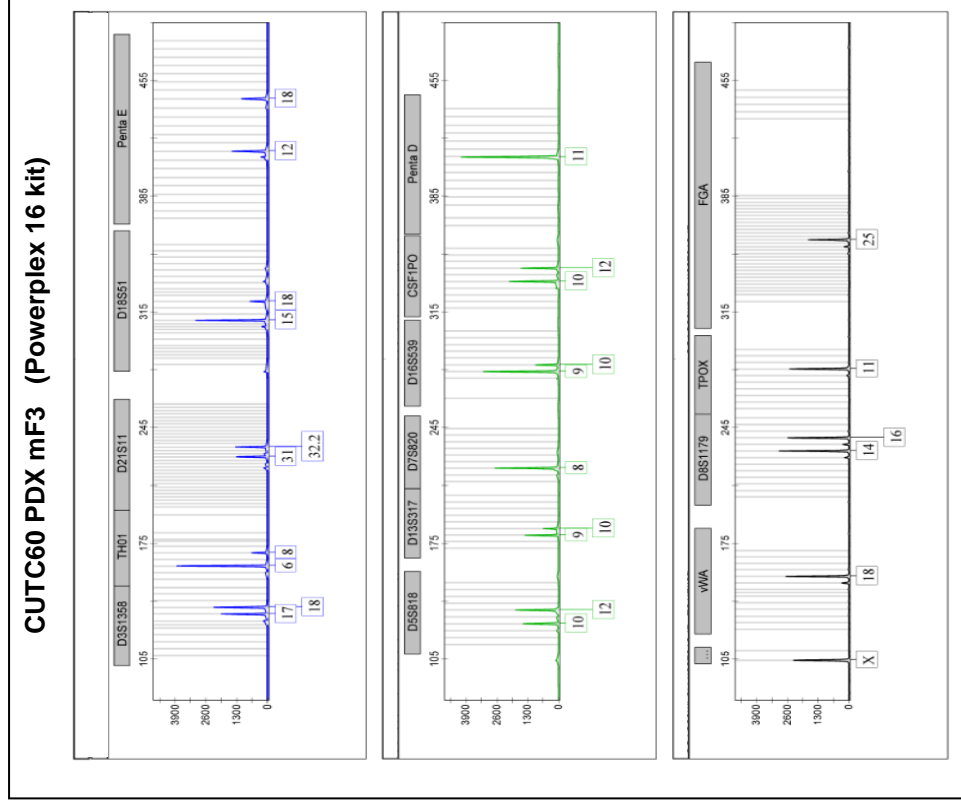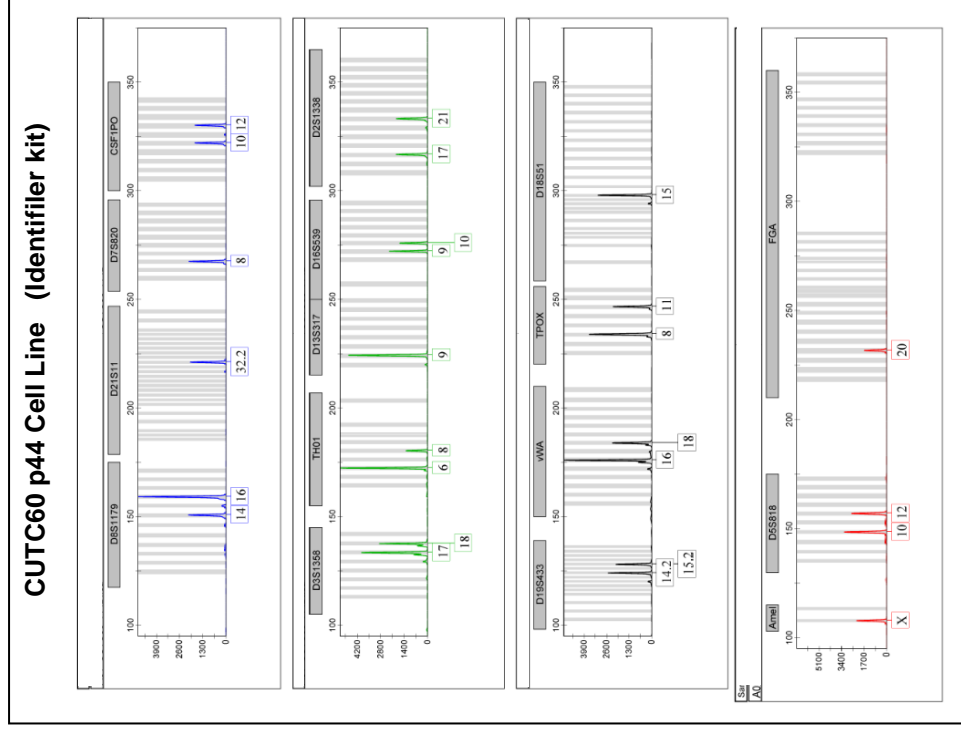

## CUTC61 Sample Information

| Sample Name | Sample Type | Passage or PDX or PDX Generation Number | Donor Gender | Amelogenin | CSF1PO | D3S1358 | D5S818 | D7S820 | D8S1179 | D13S3317 | D16S539 | D18S51 | D21S11 | FGA   | TH01 | TPOX | vWA   | % Identity Match <sup>1</sup> |
|-------------|-------------|-----------------------------------------|--------------|------------|--------|---------|--------|--------|---------|----------|---------|--------|--------|-------|------|------|-------|-------------------------------|
| Patient 61  | Tumor       | NA                                      | Female       | X          | 10 11  | 14 15   | 10 12  | 8 10   | 12 15   | 11 12    | 11 13   | 14 19  | 28 30  | 24 25 | 8 9  | 8    | 17 18 | Reference                     |
| CUTC61      | Cell Line   | 35                                      | Female       | X          | 10 11  | 14 15   | 10 12  | 8 10   | 12 15   | 11 12    | 11 13   | 14 19  | 28 30  | 24 25 | 8 9  | 8    | 17 18 | 100%                          |

1 - % Identity Match calculated relative to donor sample using Tanabe et al. (1999) algorithm for 13 autosomal CODIS loci, but not including the amelogenin results.

## STR Locus

### Patient 61 Tumor (Powerplex 16)

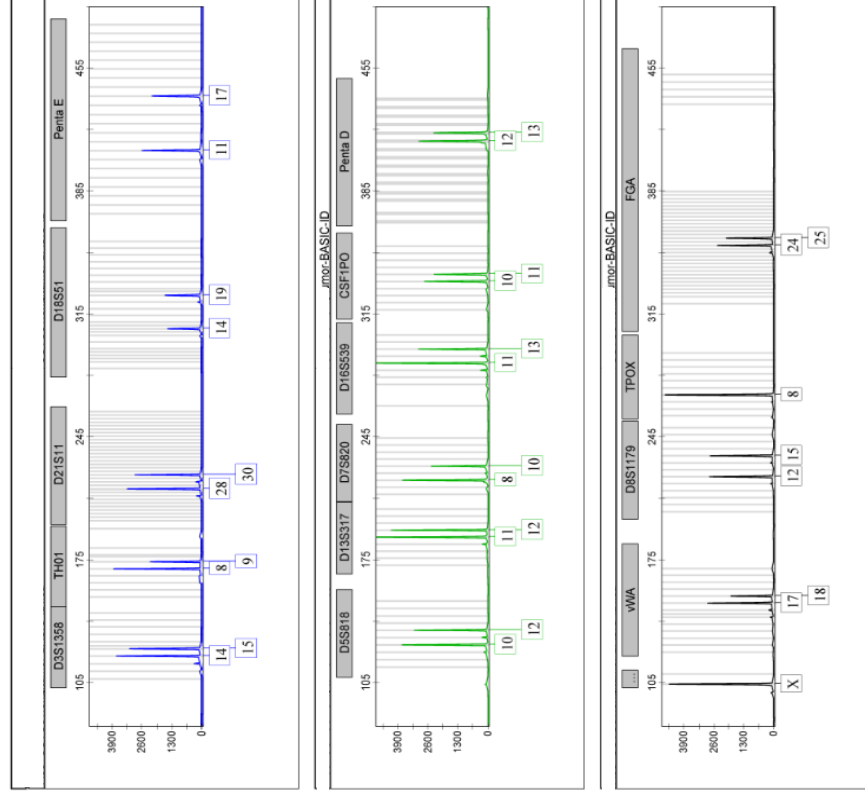

### CUTC61 p35 Cell Line (Identifiler kit)

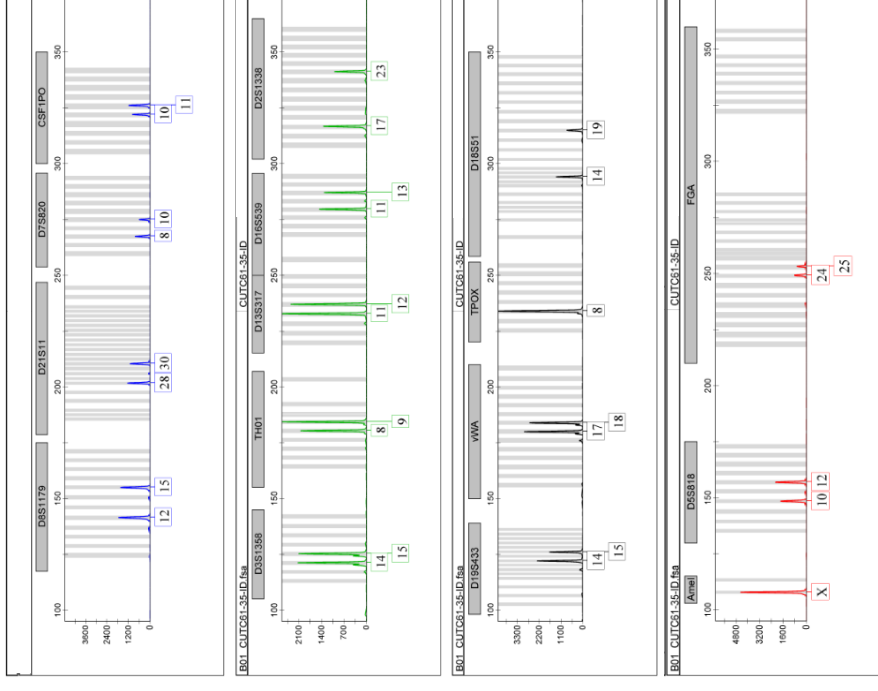

Supplement: NIHMS1521246-supplement-3.pdf [file NIHMS1521246-supplement-3.pdf]
