# Supplementary material
Source: PubMed Central journal article supplement (PMC6711777)
Supplement: NIHMS1521246-supplement-1.pdf [file NIHMS1521246-supplement-1.pdf]

**Table S1. Kinase inhibitor sensitivity of the CUTC cell lines.**

| <b>Cell line</b> | <b>Mutation</b>       | <b>Drug name</b> | <b>IC50 (nM)</b> |
|------------------|-----------------------|------------------|------------------|
| <b>CUTC48</b>    | <i>RET/PTC1</i>       | Cediranib        | 667              |
| <b>CUTC48</b>    | <i>RET/PTC1</i>       | Foretinib        | 111              |
| <b>CUTC48</b>    | <i>RET/PTC1</i>       | Lenvatinib       | 1,525            |
| <b>CUTC48</b>    | <i>RET/PTC1</i>       | Sorafenib        | 8,714            |
| <b>CUTC5</b>     | <i>BRAF</i> (p.V600E) | Dabrafenib       | 8                |
| <b>CUTC5</b>     | <i>BRAF</i> (p.V600E) | Vemurafenib      | 859              |
| <b>CUTC5</b>     | <i>BRAF</i> (p.V600E) | Selumetinib      | 195              |
| <b>CUTC5</b>     | <i>BRAF</i> (p.V600E) | PD-0325901       | 18               |
| <b>CUTC5</b>     | <i>BRAF</i> (p.V600E) | Trametinib       | 148              |
| <b>CUTC5</b>     | <i>BRAF</i> (p.V600E) | Sorafenib        | 1,461            |
| <b>CUTC60</b>    | <i>BRAF</i> (p.V600E) | Vemurafenib      | 32,049           |
| <b>CUTC60</b>    | <i>BRAF</i> (p.V600E) | Dabrafenib       | 20,624           |
| <b>CUTC60</b>    | <i>BRAF</i> (p.V600E) | Selumetinib      | 39,505           |
| <b>CUTC60</b>    | <i>BRAF</i> (p.V600E) | PD-0325901       | 9,845            |
| <b>CUTC60</b>    | <i>BRAF</i> (p.V600E) | Trametinib       | 26,725           |
| <b>CUTC60</b>    | <i>BRAF</i> (p.V600E) | Sorafenib        | 1,786            |
| <b>CUTC61</b>    | <i>HRAS</i> (p.Q61R)  | Vemurafenib      | >40,000          |
| <b>CUTC61</b>    | <i>HRAS</i> (p.Q61R)  | Dabrafenib       | >40,000          |
| <b>CUTC61</b>    | <i>HRAS</i> (p.Q61R)  | Selumetinib      | 31,549           |
| <b>CUTC61</b>    | <i>HRAS</i> (p.Q61R)  | PD-0325901       | 1,461            |
| <b>CUTC61</b>    | <i>HRAS</i> (p.Q61R)  | Trametinib       | 5,467            |
| <b>CUTC61</b>    | <i>HRAS</i> (p.Q61R)  | Sorafenib        | 9,554            |
