# Supplementary material
Source: PubMed Central journal article supplement (PMC6711777)
Supplement: NIHMS1521246-supplement-2.pdf [file NIHMS1521246-supplement-2.pdf]

**Table S2. Summary of CUTC cell line take rates *in vivo*.**

| <b>Cell Line</b> | <b>Orthotopic Take Rate</b> | <b>Flank Take Rate</b> | <b>PDX Model</b> |
|------------------|-----------------------------|------------------------|------------------|
| <b>CUTC5</b>     | 8/8 (SCID/NRG)              | 6/6 (NSG)              | No               |
| <b>CUTC48</b>    | 0/8                         | 0/10                   | No               |
| <b>CUTC60</b>    | 6/6 (nude)                  | 9/10 (nude)            | Yes              |
| <b>CUTC61</b>    | 0/7                         | ND*                    | No               |

\*ND = not determined
