# Supplementary material
Source: PubMed Central journal article supplement (PMC6711777)
Supplement: NIHMS1521246-supplement-4.pdf [file NIHMS1521246-supplement-4.pdf]

## Supplemental Figure Legends

**Figure S1. Electropherograms of the CUTC5, CUTC48, CUTC60 and CUTC61 cell line, PDX, and patient samples.** STR analysis was performed with the indicated kits (Fisher Identifiler, Promega Powerplex® 16 HS). STR electropherograms were analyzed and alleles called using GeneMapper™ version 4.0 software and the results were confirmed by visual inspection. Percent match was calculated as described in the Materials and Methods. The passage numbers of the cell lines and PDX samples is shown.
